# Supplementary material for: Athyrium multidentatum (Doll.) Ching extract induce apoptosis via mitochondrial dysfunction and oxidative stress in HepG2 cells
Source: PubMed Central journal article supplement (PMC5442098; doi:10.1038/s41598-017-02573-8), 2017-05-23

## Supplementary files

### *Athyrium multidentatum* (Doll.) Ching extract induce apoptosis via mitochondrial dysfunction and oxidative stress in HepG2 cells

Guoyuan Qi, Zhigang Liu, Rong Fan, Ziru Yin, Yashi Mi, Bo Ren, Xuebo Liu\*

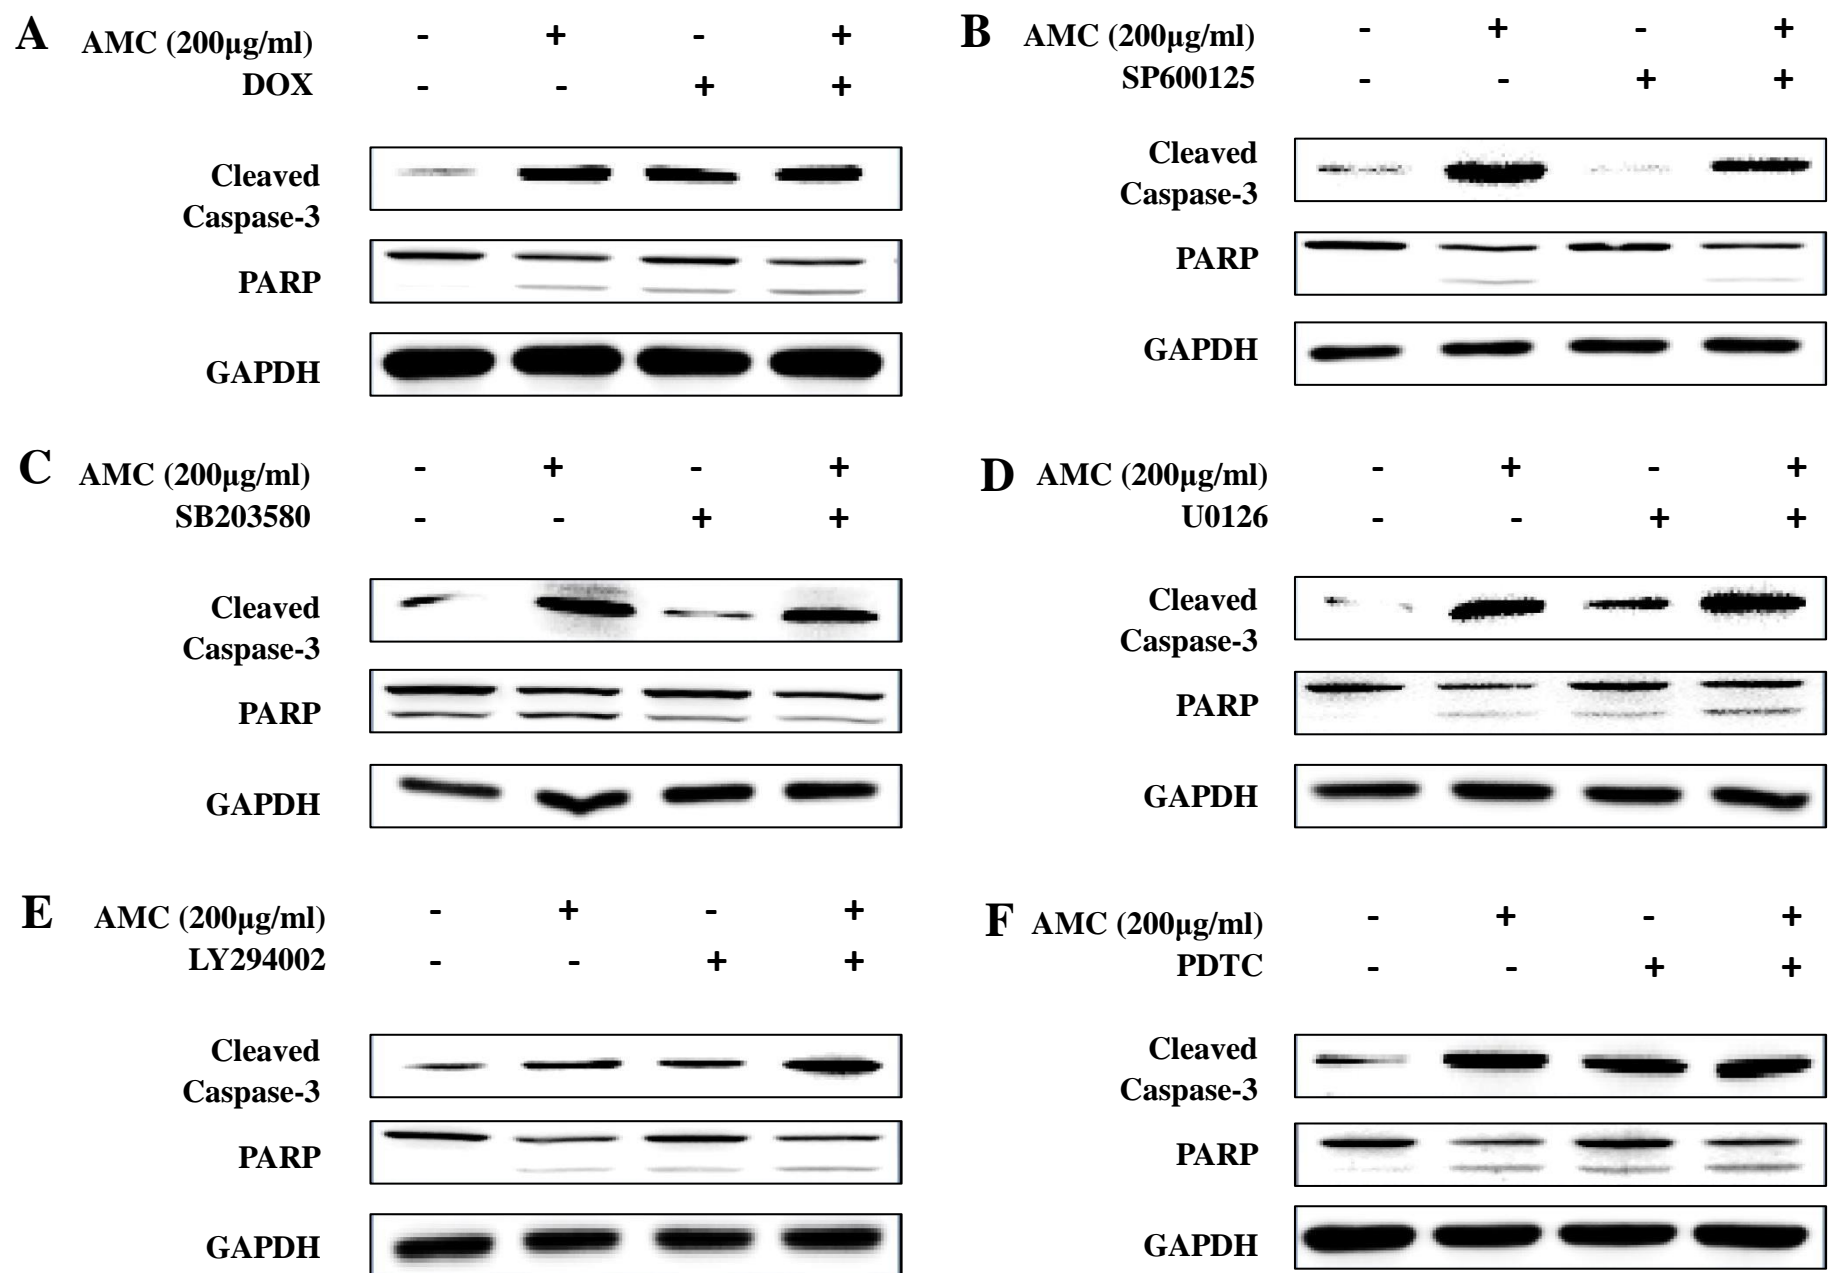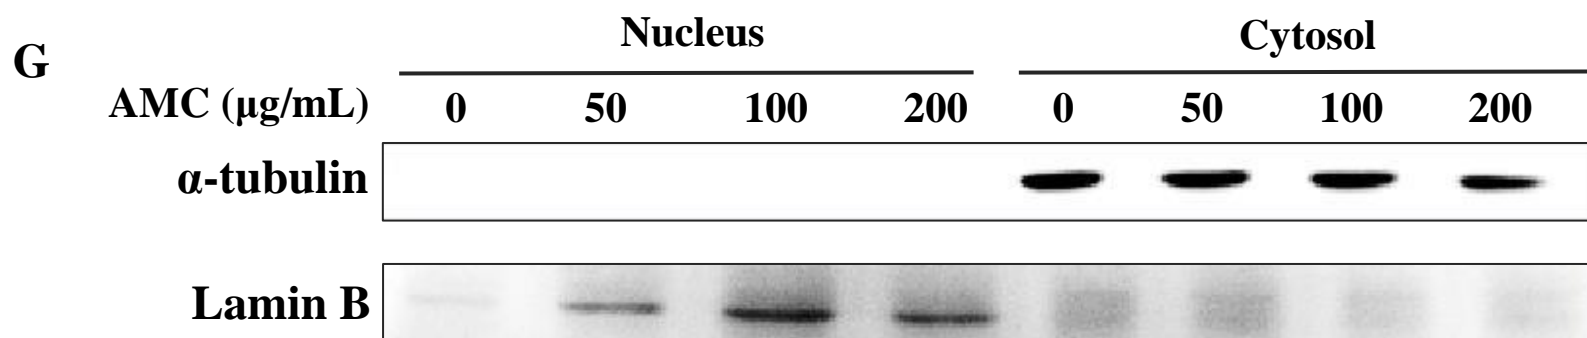

Supplement: 41598_2017_2573_MOESM1_ESM.pdf [file 41598_2017_2573_MOESM1_ESM.pdf]
